# Supplementary material
Source: Springer Nature journal article supplement (https://www.springermedizin.de/resource/supplementary/12985_2009_784_MOESM1_ESM.pdf/9609182)

**A ELISA**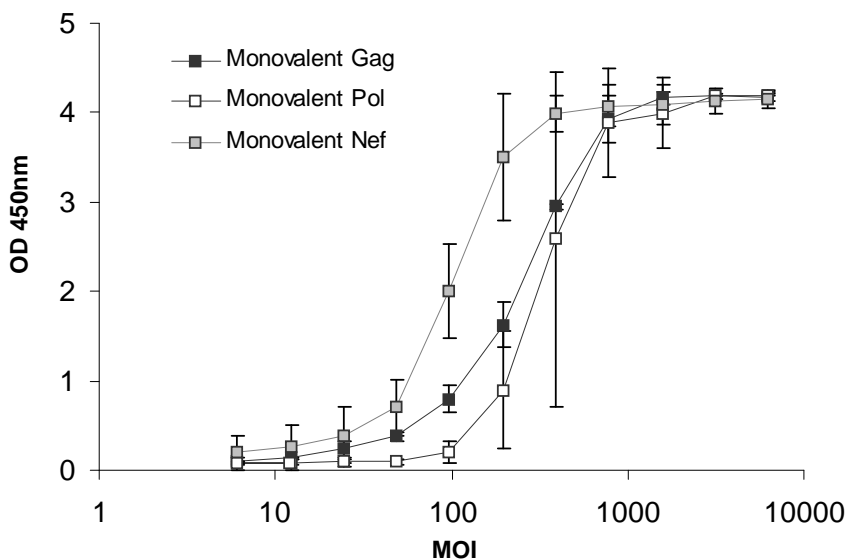**B RT-qPCR**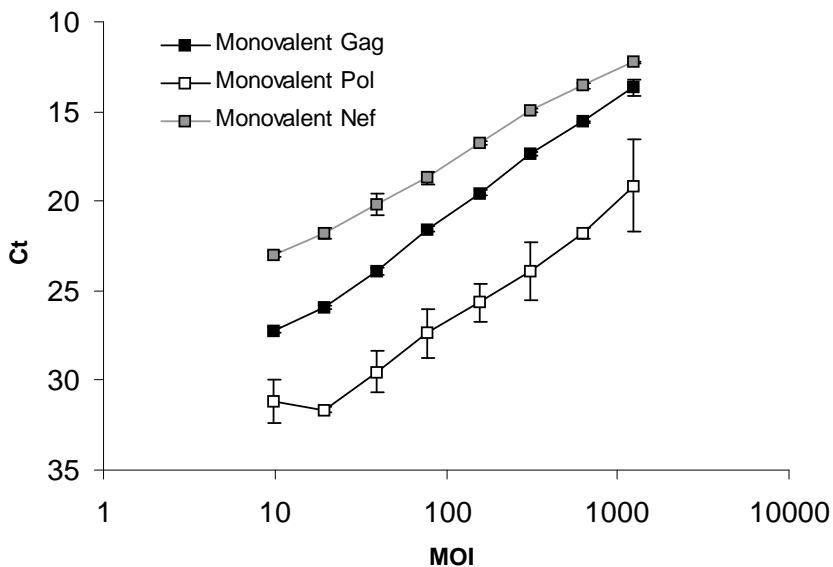**C Silver Stain**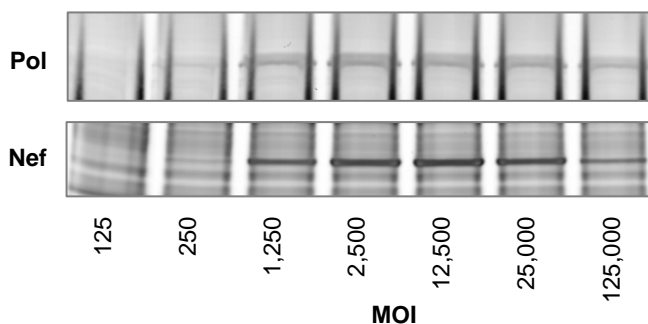

Supplement: MOESM1 [file 9609182]
